# Supplementary material for: Associations between single and combined occupational mechanical exposures and surgery for subacromial impingement syndrome: a nationwide Danish cohort study
Source: PubMed Central journal article supplement (PMC9888441; doi:10.5271/sjweh.4032), 2022-08-31
Supplement: SJWEH-48-490-S001.pdf [file SJWEH-48-490-S001.pdf]

## Associations between single and combined occupational mechanical exposures and surgery for subacromial impingement syndrome: a nationwide Danish cohort study<sup>1</sup>

by Annett Dalbøge, PhD,<sup>2</sup> Poul Frost, PhD, Johan Hviid Andersen, PhD, Susanne Wulff Svendsen, PhD

1. Supplementary material
2. Correspondence to: Annett Dalbøge, Danish Ramazzini Centre, Department of Occupational Medicine, Aarhus University Hospital, Palle Juul-Jensens Boulevard 99, 8200 Aarhus N, Denmark. [E-mail: anetaner@rm.dk].

**Table S1.** Estimation of exposure duration for arm elevation single and arm elevation combined with force >0 for a 10-year time window with a 1-year lag.

| Year | Arm elevation (min/day) | Force (score) | Arm elevation single |                     |                | Arm elevation combined with force >0 |                     |                |
|------|-------------------------|---------------|----------------------|---------------------|----------------|--------------------------------------|---------------------|----------------|
|      |                         |               | >2.25–5.00 min/day   | ≥5.00–10.00 min/day | ≥10.00 min/day | >2.25–5.00 min/day                   | ≥5.00–10.00 min/day | ≥10.00 min/day |
| 1993 | 12.0                    | 2             | 0                    | 0                   | 1              | 0                                    | 0                   | 1              |
| 1994 | 12.0                    | 2             | 0                    | 0                   | 1              | 0                                    | 0                   | 1              |
| 1995 | 7.5                     | 1             | 0                    | 1                   | 0              | 0                                    | 1                   | 0              |
| 1996 | 7.5                     | 1             | 0                    | 1                   | 0              | 0                                    | 1                   | 0              |
| 1997 | 7.5                     | 1             | 0                    | 1                   | 0              | 0                                    | 1                   | 0              |
| 1998 | 7.5                     | 1             | 0                    | 1                   | 0              | 0                                    | 1                   | 0              |
| 1999 | 7.5                     | 1             | 0                    | 1                   | 0              | 0                                    | 1                   | 0              |
| 2000 | 7.5                     | 1             | 0                    | 1                   | 0              | 0                                    | 1                   | 0              |
| 2001 | 7.5                     | 0             | 0                    | 1                   | 0              | 0                                    | 0                   | 0              |
| 2002 | 7.5                     | 0             | 0                    | 1                   | 0              | 0                                    | 0                   | 0              |
| -    | -                       | -             | <b>0</b>             | <b>8</b>            | <b>2</b>       | <b>0</b>                             | <b>6</b>            | <b>2</b>       |

**Table S2.** Correlation matrix between the intensity-specific exposure duration variables for the different exposure combinations.

| <b>Arm elevation combined with repetition</b>           |       |        |      | <b>Repetition combined with arm elevation</b>           |       |        | <b>Force combined with arm elevation</b>                |        |       |        |      |
|---------------------------------------------------------|-------|--------|------|---------------------------------------------------------|-------|--------|---------------------------------------------------------|--------|-------|--------|------|
|                                                         | Low   | Medium | High |                                                         | Low   | Medium | High                                                    |        | Low   | Medium | High |
| Low                                                     | 1.00  |        |      | Low                                                     | 1.00  |        |                                                         | Low    | 1.00  |        |      |
| Medium                                                  | -0.10 | 1.00   |      | Medium                                                  | -0.09 | 1.00   |                                                         | Medium | -0.24 | 1.00   |      |
| High                                                    | -0.14 | -0.07  | 1.00 | High                                                    | -0.14 | -0.04  | 1.00                                                    | High   | -0.15 | -0.05  | 1.00 |
| <b>Arm elevation combined with force</b>                |       |        |      | <b>Repetition combined with force</b>                   |       |        | <b>Force combined with repetition</b>                   |        |       |        |      |
| Low                                                     | 1.00  |        |      | Low                                                     | 1.00  |        |                                                         | Low    | 1.00  |        |      |
| Medium                                                  | -0.07 | 1.00   |      | Medium                                                  | -0.09 | 1.00   |                                                         | Medium | -0.12 | 1.00   |      |
| High                                                    | -0.09 | -0.07  | 1.00 | High                                                    | -0.13 | -0.04  | 1.00                                                    | High   | -0.10 | -0.25  | 1.00 |
| <b>Arm elevation combined with repetition and force</b> |       |        |      | <b>Repetition combined with arm elevation and force</b> |       |        | <b>Force combined with arm elevation and repetition</b> |        |       |        |      |
| Low                                                     | 1.00  |        |      | Low                                                     | 1.00  |        |                                                         | Low    | 1.00  |        |      |
| Medium                                                  | -0.10 | 1.00   |      | Medium                                                  | -0.08 | 1.00   |                                                         | Medium | -0.12 | 1.00   |      |
| High                                                    | -0.12 | -0.07  | 1.00 | High                                                    | -0.12 | -0.04  | 1.00                                                    | High   | -0.10 | -0.05  | 1.00 |
